# Supplementary material for: A nanotubular coating with both high transparency and healable superhydrophobic self-cleaning properties
Source: Royal Society of Chemistry journal article supplement (doi:10.1039/c5ra26977f), 2016-01-01
Supplement: c5ra26977f4.pdf [file c5ra26977f4.pdf]

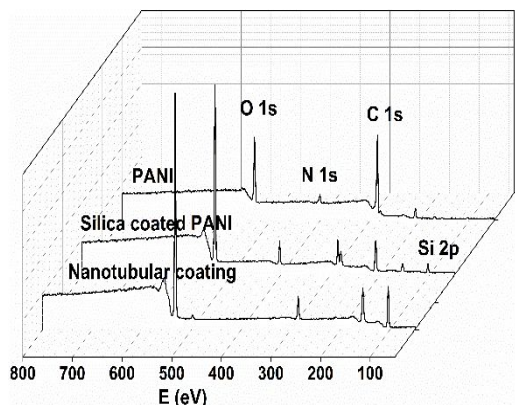

**Figure S1.** X-ray photoelectron spectra of PANI coating, silica coated PANI coating and nanotubular coating.

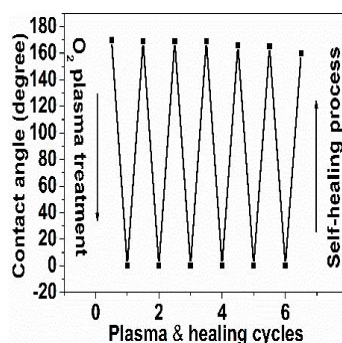

**Figure S3.** Static water contact angles after 6 plasma-etching/healing cycles at 70 °C for the coating loading POTS.

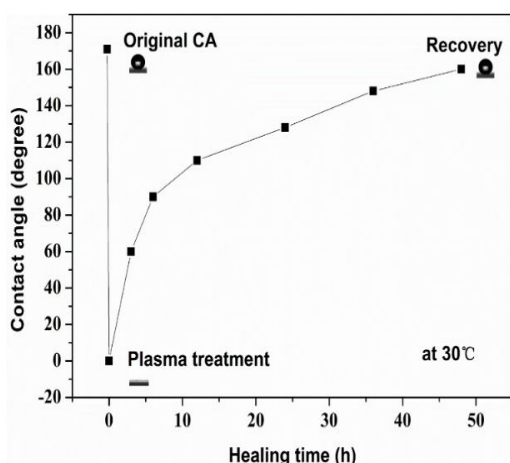

**Figure S2.** Static water contact angles of a plasma treated surface with the healing time at 30 °C.

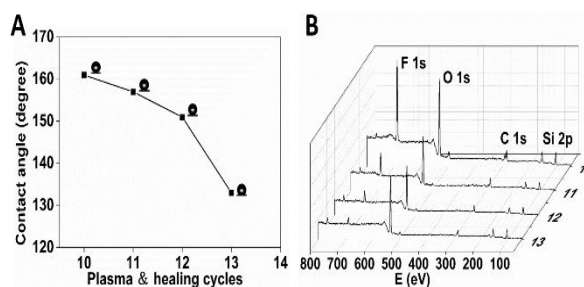

**Figure S4.** Plasma-etching/healing cycles for the nanotubular surface at 70 °C and X-ray photoelectron spectra of the surface corresponding.

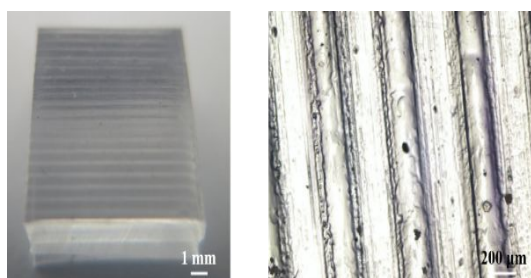

**Figure S5.** Photos of polydimethylsiloxane stamp and its stripes.

**Movie S1.** The superhydrophilicity of the surface after plasma treatment.

**Movie S2.** The superhydrophobicity of the surface after 10 plasma-etching/healing cycles.

**Movie S3.** Mechanical resistance evaluated by sand abrasion and its superhydrophobicity after sand abrasion.
